# Supplementary material
Source: HighWire-hosted journal article supplement (http://dmd.aspetjournals.org/highwire/filestream/71673/field_highwire_adjunct_files/0/Supplemental_80648.pdf)
Supplement: Supplemental_80648.pdf [file Supplemental_80648.pdf]

**Supplemental Material for**

**Drug Metabolism and Disposition**

**An investigation into the prediction of the plasma concentration-time profile and its inter-individual variability for a range of flavin-containing monooxygenase substrates using a mechanistic physiologically based pharmacokinetic modelling approach**

Venkatesh Pilla Reddy, Barry C Jones, Abhishek Srivastava Nicola Colclough, Joanne Wilson, and

Danxi Li

**Supplementary Table 1:** Human *in vitro* data for FMO substrates (Jones et al., 2017)

|             | Human hepatocytes                    |                     |                               |                                 | Human liver microsomes |        |                               |                                 | rFMO                            |              |               |                                |      |      | Fm (% FMO) contribution |
|-------------|--------------------------------------|---------------------|-------------------------------|---------------------------------|------------------------|--------|-------------------------------|---------------------------------|---------------------------------|--------------|---------------|--------------------------------|------|------|-------------------------|
|             | Clint (μl/min/10 <sup>6</sup> cells) | Fu inc <sup>a</sup> | Predicted Clint u (ml/min/kg) | Predicted Clearance (ml/min/kg) | Clint (μl/min/mg)      | Fu mic | Predicted Clint u (ml/min/kg) | Predicted Clearance (ml/min/kg) | Clint (μl/min/pmol) with [ISEF] |              |               | Clint (μl/min/mg) <sup>c</sup> |      |      |                         |
|             |                                      |                     |                               |                                 |                        |        |                               |                                 | FMO1                            | FMO3         | FMO5          | FMO1                           | FMO3 | FMO5 |                         |
| Benzylamine | 9                                    | 0.74                | 104                           | 11                              | 18                     | 0.35   | 148                           | 13                              | 0.435 [0.9]                     | 0.288 [0.9]  | 0.001 [>100]  | 261                            | 92   | 1    | 53                      |
| Imipramine  | 9                                    | 0.65                | 122                           | 13                              | 14                     | 0.31   | 129                           | 13                              | 0.163 [1.6]                     | 0.013 [13.6] | 0.001 [>100]  | 98                             | 4    | 2    | 21                      |
| Olanzapine  | 2                                    | 0.86                | 18                            | 5                               | <3 <sup>b</sup>        | 0.73   | 12                            | 4                               | 0.036 [1.8]                     | 0.005 [9.4]  | -             | 21                             | 1    | -    | 23 <sup>#</sup>         |
| Ranitidine  | 0.6*                                 | 0.98                | 5                             | 4                               | <3 <sup>b</sup>        | 0.97   | 9                             | 6                               | 0.011 [5.6]                     | 0.003 [14.5] | 0.028 [5]     | 7                              | 1    | 47   | 26 <sup>#</sup>         |
| Moclobemide | 3                                    | 0.87                | 30                            | 11                              | 3                      | 0.98   | 9                             | 5                               | 0.018 [5.6]                     | 0.031 [2.1]  | 0.003 [71]    | 11                             | 10   | 5    | 38                      |
| Itopride    | 11                                   | 0.88                | 107                           | 14                              | 18                     | 1.05   | 49                            | 10                              | 0.340 [1.4]                     | 0.497 [0.6]  | -             | 204                            | 159  | -    | 96                      |
| Clozapine   | 5                                    | 0.33                | 131                           | 10                              | 18                     | 0.30   | 173                           | 11                              | 0.031 [9.9]                     | -            | -             | 18                             | -    | -    | 23                      |
| Tamoxifen   | 4                                    | 0.003               | 9706                          | 3                               | 4                      | 0.02   | 662                           | 0.2                             | 0.083 [1.4]                     | -            | -             | 50                             | -    | -    | 28 <sup>#</sup>         |
| Tozasertib  | 29                                   | 0.21                | 1177                          | 19                              | 61                     | 0.18   | 971                           | 18                              | 0.244 [5.6]                     | 0.481 [1.9]  | 0.0004 [>100] | 146                            | 154  | 1    | 38                      |

All data n = 3 except for data marked with \* which is n = 2; <sup>a</sup>Data from rat hepatocytes; <sup>b</sup>Value of 3µl/min/mg used in calculations

$$**\text{ISEF calculated using formula for each isoform} = \text{ISEF} = \frac{\text{Clint, u in HLM } \left(\frac{\mu\text{l}}{\text{min}}\right) / \text{HLM FMO abundance } \left(\frac{\text{pmol}}{\text{mg}}\right)}{\text{Clint, u in rFMO } \left(\frac{\mu\text{l}}{\text{min}}\right) / \text{pmol}}$$

<sup>#</sup> It was not possible to determine the FMO contribution for ranitidine, olanzapine, and tamoxifen due to the low intrinsic clearance. However, an approximate FMO contribution was derived by fitting of the available rFMO Clint and FMO contribution data.

<sup>c</sup> Data was corrected for in-vitro FAD content.

**Supplementary Table 2:** Options used to define the elimination within PBPK platform (Simcyp V16)

| <b>Elimination option</b>      | <b>Hepatocyte Data</b>                 | <b>In-Vitro HLM Data</b>                                                                                            | <b>In-Vitro rFMO Data</b>                                                                                                                                                                                                                                                                                                                                                                                                                                                                                                                                                                                                                                                                                 |
|--------------------------------|----------------------------------------|---------------------------------------------------------------------------------------------------------------------|-----------------------------------------------------------------------------------------------------------------------------------------------------------------------------------------------------------------------------------------------------------------------------------------------------------------------------------------------------------------------------------------------------------------------------------------------------------------------------------------------------------------------------------------------------------------------------------------------------------------------------------------------------------------------------------------------------------|
| <b>Option used</b>             | Whole organ metabolic clearance        | Whole organ metabolic clearance or enzyme kinetics via HLM option to take into account of non-cyp mediated pathways | Enzyme kinetics data of rFMO was used. For remaining metabolic CL was added as a HLM CL                                                                                                                                                                                                                                                                                                                                                                                                                                                                                                                                                                                                                   |
| <b>FMO expression assigned</b> | Default, not linked to specific enzyme | Unused UGT used as an user defined option within Simcyp                                                             | <p>Unused UGT used as an user defined option within Simcyp (see Itopride workspace)<br/>Scalar value (ISEF or tissue specific value was optimized for rFMO data</p> <p>A tutorial video (entitled Elimination Route UGT- Part 2) in the E-learning tab of the Consortium Members' area facility of Certara shows the utilization of unused UGT enzyme and linking it to the abundance in population and tissue (<a href="https://members.simcyp.com/">https://members.simcyp.com/</a>)</p> <p><a href="https://members.simcyp.com/account/elearning/stream/?id=fd410b95-4fff-42e4-ac4b-e01f04a9b13a">https://members.simcyp.com/account/elearning/stream/?id=fd410b95-4fff-42e4-ac4b-e01f04a9b13a</a></p> |

**Supplementary Figure 1:** Forest plot showing the physiologically based pharmacokinetic modeling performance of FMO substrates using rFMO data with and without scalar (tissue specific or ISEF) in the model

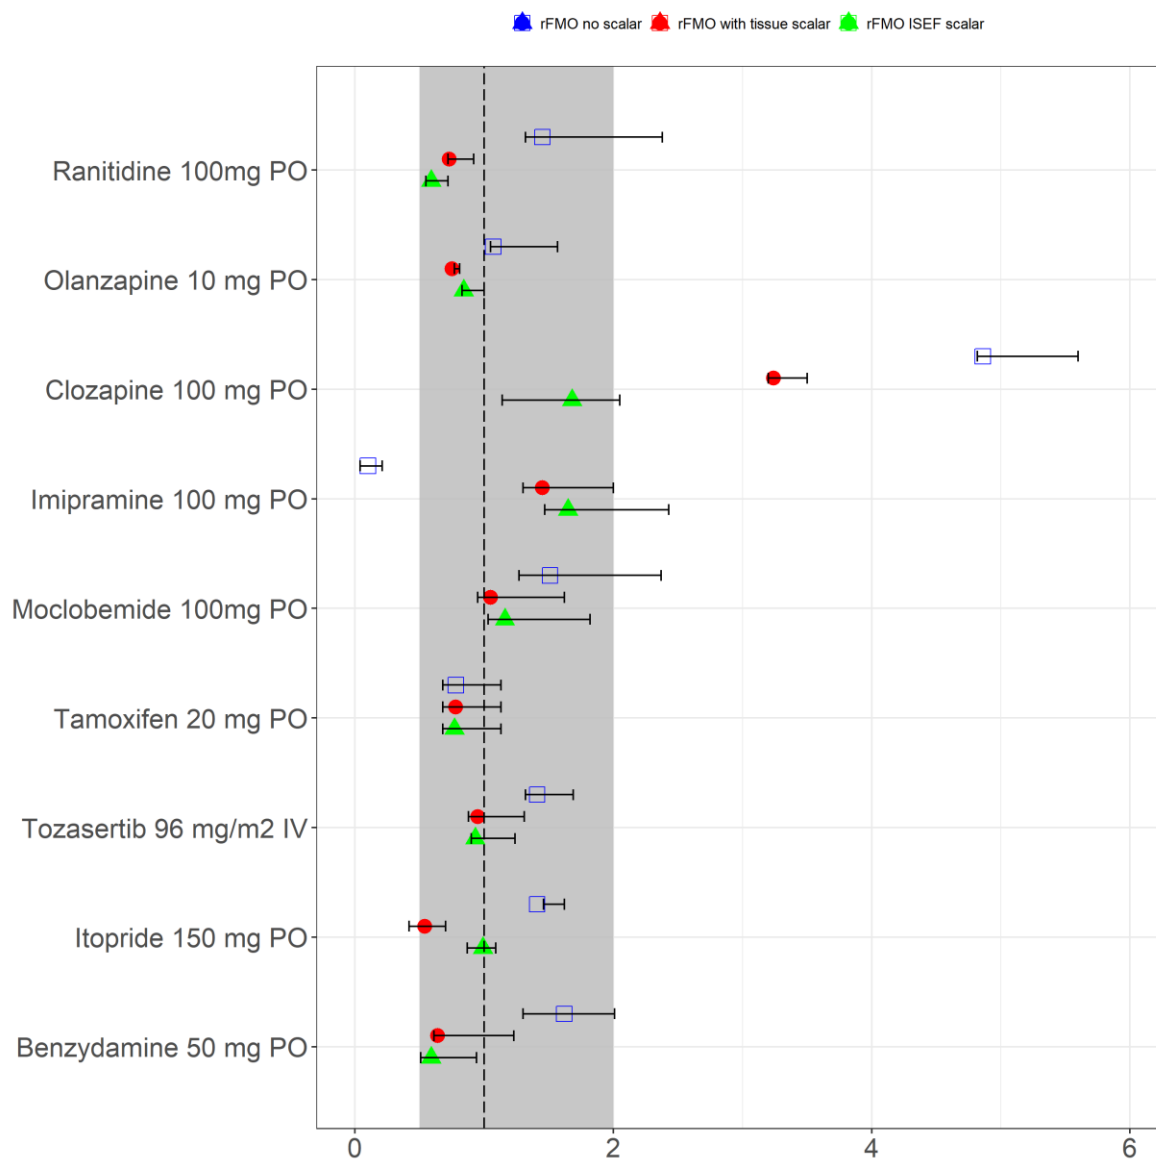

**Supplementary Table 3: Simulated mean (SD) PK parameters for FMO substrates using HLM or rFMO with ISEF or tissue specific scalar data**

| Drug        | Route | Dose (mg) | HLM           |              |          | rFMO tissue scalar |              |          | rFMO ISEF scalar |              |          |
|-------------|-------|-----------|---------------|--------------|----------|--------------------|--------------|----------|------------------|--------------|----------|
|             |       |           | AUC [ng*h/ml] | Cmax [ng/ml] | CL [L/h] | AUC [ng*h/ml]      | Cmax [ng/ml] | CL [L/h] | AUC [ng*h/ml]    | Cmax [ng/ml] | CL [L/h] |
| Benzydamine | PO    | 50        | 5329 (2411)   | 416 (135)    | 13 (6)   | 3441 (2296)        | 378 (135)    | 14 (9)   | 2931 (1720)      | 345 (126)    | 17 (11)  |
| Itopride    | PO    | 150       | 5192 (1840)   | 1090 (194)   | 34 (15)  | 1161 (395)         | 828 (175)    | 129 (56) | 2142 (553)       | 1112 (201)   | 70 (25)  |
| Tozasertib  | IV    | 96        | 88109 (2088)  | 3480 (798)   | 50 (11)  | 73764 (17263)      | 2948 (674)   | 57 (12)  | 73763 (15474)    | 2888 (612)   | 58 (13)  |
| Tamoxifen   | PO    | 30        | 2521 (1579)   | 116 (27)     | 9 (3)    | 1831 (436)         | 42 (11)      | 17 (5)   | 1788 (437)       | 43 (11)      | 17 (5)   |
| Moclobemide | PO    | 100       | 1509 (497)    | 417 (140)    | 74 (28)  | 1653 (437)         | 478 (124)    | 61 (18)  | 1822 (468)       | 499 (130)    | 55 (16)  |
| Imipramine  | PO    | 100       | 2021 (740)    | 51 (21)      | 57 (24)  | 1433 (810)         | 44 (21)      | 97 (12)  | 1625 (957)       | 46 (22)      | 84 (51)  |
| Clozapine   | PO    | 100       | 6080 (2487)   | 566 (216)    | 19 (8)   | 12931 (5195)       | 672 (233)    | 9 (6)    | 6698 (3252)      | 572 (212)    | 20 (14)  |
| Olanzapine  | PO    | 10        | 819 (226)     | 22 (6)       | 13 (4)   | 615 (210)          | 20 (6)       | 19 (8)   | 691 (224)        | 21 (6)       | 16 (6)   |
|             |       |           |               |              |          |                    |              |          |                  |              |          |
| Ranitidine  | PO    | 100       | 1960 (711)    | 366 (103)    | 56 (18)  | 1265 (628)         | 238 (97)     | 79 (42)  | 1024 (485)       | 207 (93)     | 67 (74)  |

\*Cmax = conc. at end of infusion, & AUC (0-4hr) to match the reported AUC; PO: Per oral; IV Intravenous; SS: Steady-state; QD: once daily, BID: Twice daily; heps, hepatocytes; SD: standard deviation

**Supplementary Table 4:** Paediatrics simulations for Itopride using rFMO data

| <b>Age group</b>      | <b><i>FMO1</i><br/>Expression*</b> | <b><i>FMO3</i><br/>Expression*</b> | <b><i>Itopride dose,</i><br/><i>mg QD</i></b> | <b><i>Mean AUC (0-24),</i><br/><i>h·ng/mL</i></b> |
|-----------------------|------------------------------------|------------------------------------|-----------------------------------------------|---------------------------------------------------|
| Adults                | 1**                                | 71±41 ***                          | 150                                           | 2154                                              |
| 11–17 years           | 0.1±0.3                            | 26.9±8.6                           | 40                                            | 2435                                              |
| 10 months to 11 years | 2.0±1.8                            | 12.7±8.0                           | 12                                            | 2281                                              |
| 3 weeks to <10 months | 3.8±2.6                            | 4.7±5.9                            | 2.8                                           | 2006                                              |
| 0–3 weeks             | 7.8±5.3                            | 1.1±3.3                            | 1.4                                           | 2044                                              |

FMO expression data for age 0 to 17 years is from Koukouritaki et al., (Koukouritaki et al., 2002)

\*\* (Cashman and Zhang, 2006)

\*\*\* (Haining et al., 1997; Overby et al., 1997)

**Supplementary Table 5:** Mass Spectrometer parameters for FMO substrates

| Analyte        | MRM (Parent→Daughter)<br>m/z | Dwell<br>(s) | Cone<br>voltage<br>(V) | Collision<br>energy (V) |
|----------------|------------------------------|--------------|------------------------|-------------------------|
| Tamoxifen      | 372.166→129.175              | 0.080        | 10                     | 25                      |
| Moclobemide    | 269.053→182.073              | 0.080        | 10                     | 15                      |
| Olanzapine     | 313.127→84.118               | 0.080        | 10                     | 25                      |
| Imipramine     | 281.178→86.025               | 0.080        | 60                     | 15                      |
| Tozasertib     | 465.195→190.215              | 0.080        | 20                     | 40                      |
| Ranitidine     | 315.095→176.243              | 0.040        | 10                     | 15                      |
| Benzydamine    | 310.173→86.065               | 0.080        | 60                     | 30                      |
| Clozapine      | 327.14→270.16                | 0.080        | 40                     | 20                      |
| Itopride       | 359.22→71.94                 | 0.80         | 10                     | 40                      |
| Verapamil (IS) | 455.198→165.207              | 0.020        | 15                     | 25                      |

**Supplementary Text:****LC-MS/MS analysis:**

The concentration of all compounds in the incubations was determined by LC-MS/MS. An Acquity ultra performance liquid chromatography (UPLC) system, (Waters, UK) coupled to a triple-quadrupole mass spectrometer (Xevo TQ-S; Waters, Milford, MA) was used to carry out the sample analysis. The analytes were separated by reverse-phase liquid chromatography using a Waters Atlantis® T3, 3µm, 2.1X50mm column (Waters, UK). Mobile phases A and B consisted of water (containing 0.1% FA v/v) and ACN (containing 0.1% FA v/v), respectively. The flow rate was held constant at 0.73 ml/min throughout the gradient run. The initial mobile phase composition of 95% A and 5% B was held for 0.3 minutes. Mobile phase B was then increased linearly to 70% until 1.5 minutes, followed by further increase to 99% B until 1.59 minutes. At 1.6 minutes the composition of A and B was reversed to the initial 95% A and 5% B and was held until 2 minutes. Analyte quantitation was achieved by MS–MS detection in positive electrospray ionization mode. The MS operating conditions were as follows: the capillary voltage was 1.14 kV and source offset was 50 V. The desolvation temperature was set to 600 °C. Nitrogen was used as the desolvation gas (800 L/Hr) and cone gas (150 L/Hr). Argon was used as the collision gas at a flow rate of 0.15 ml/min. Detection of the ions was performed in the MRM mode using the transitions described in Supplementary Table 5. Peak integration and calibrations were performed using TargetLynx software (Version 4.1, Waters, Milford, MA).

**References**

- Cashman JR and Zhang J (2006) Human flavin-containing monooxygenases. *Annu Rev Pharmacol Toxicol* **46**:65-100.
- Haining RL, Hunter AP, Sadeque AJ, Philpot RM, and Rettie AE (1997) Baculovirus-mediated expression and purification of human FMO3: catalytic, immunochemical, and structural characterization. *Drug Metab Dispos* **25**:790-797.
- Jones BC, Srivastava A, Colclough N, Wilson J, Reddy VP, Amberntsson S, and Li D (2017) An Investigation into the Prediction of in Vivo Clearance for a Range of Flavin-containing Monooxygenase Substrates. *Drug Metab Dispos* **45**:1060-1067.
- Koukouritaki SB, Simpson P, Yeung CK, Rettie AE, and Hines RN (2002) Human hepatic flavin-containing monooxygenases 1 (FMO1) and 3 (FMO3) developmental expression. *Pediatr Res* **51**:236-243.
- Overby LH, Carver GC, and Philpot RM (1997) Quantitation and kinetic properties of hepatic microsomal and recombinant flavin-containing monooxygenases 3 and 5 from humans. *Chem Biol Interact* **106**:29-45.
